# Supplementary material for: Gene expression and adaptive evolution of ZBED1 in the hibernating great horseshoe bat (Rhinolophus ferrumequinum)
Source: Oxford University Press journal article supplement (doi:10.1242/jeb.133272), 2016-01-01
Supplement: jeb133272supp.pdf [file jeb133272supp.pdf]

## Supplementary information

Table S1. Primers of *ZBED1* and *β-actin* used for real time PCR.

| Gene             | Primer     | Base sequence (5'- 3') | Tm (°C) | Products (bp) |
|------------------|------------|------------------------|---------|---------------|
| <i>ZBED1</i>     | Sense      | TGACGTAGGTCCTGTTCTGGTT | 60.0    | 238           |
|                  | Anti-sense | CTCATCTGCGATGGGCTGT    |         |               |
| <i>β-actin</i> * | Sense      | GACCTCTATGCCAACACAG    | 60.0    | 190           |
|                  | Anti-sense | CATCTGCTGGAAGGTGGAC    |         |               |

\*Primer pair of *β-actin* was obtained in Chen et al. 2008.

Table S2. Sample information used for phylogenetic and positive selection analyses. The sampling sites and their corresponding mtDNA clades are shown. NE, Northeast group; CE, Central-East group; SW, Southwest group.

| Sites No. | Sites              | Evolutionary Group | Location |           | Samples No.                                 |
|-----------|--------------------|--------------------|----------|-----------|---------------------------------------------|
|           |                    |                    | Latitude | Longitude |                                             |
| 1         | Ji'an, Jilin       | NE                 | 41°03'   | 125°50'   | JL07, JL09, JL10, JL11, JL12, JL13          |
| 2         | Shenyang, Liaoning | NE                 | 41°48'   | 123°23'   | LN1307, LN1308, LN1309, LN1310, LN1344      |
| 3         | Fangshan, Beijing  | CE                 | 39°43'   | 115°59'   | BJ1311, BJ1312, BJ1315, BJ1316, BJ1317      |
| 4         | Jinan, Shandong    | CE                 | 36°43'   | 117°07'   | SD19, SD20                                  |
| 5         | Feixian, Shandong  | CE                 | 35°08'   | 117°44'   | SD1185, SD1188, SD1189                      |
| 6         | Datong, Shanxi     | CE                 | 40°03'   | 113°19'   | SX0827, SX0830, SX0831                      |
| 7         | Lantian, Shaanxi   | CE                 | 34°04'   | 109°24'   | SXi1216, SXi1217, SXi1218, SXi1220, SXi1221 |
| 8         | Anyang, Henan      | CE                 | 35°47'   | 113°56'   | HeN1201, HeN1202, HeN1204, HeN1208, HeN1211 |
| 9         | Chaohu, Anhui      | CE                 | 31°57'   | 117°52'   | AH0801                                      |
| 10        | Lu'an, Anhui       | CE                 | 31°22'   | 116°12'   | AH1002, AH1004                              |
| 11        | Tianshui, Gansu    | SW                 | 34°20'   | 106°06'   | GS1005, GS1008, GS1009, GS1011              |
| 12        | Kunming, Yunnan    | SW                 | 24°30'   | 102°20'   | YN21, YN07205                               |
| 13        | Dali, Yunnan       | SW                 | 25°20'   | 100°07'   | YN22, YN23, YN24                            |

Table S3. 39 *ZBED1* haplotypes and their corresponding individuals (alleles). Different alleles from each individual are distinguished by adding ‘A’ or ‘B’ tags to their individual identifiers.

| Haplotype | Allele                                                         | Haplotype | Allele                                                                 | Haplotype | Allele     |
|-----------|----------------------------------------------------------------|-----------|------------------------------------------------------------------------|-----------|------------|
| Hap 1     | AH0801A, SX0827A                                               | Hap 14    | GS1011A                                                                | Hap 27    | SD1189B    |
| Hap 2     | AH0801B, AH1002B, BJ1317A, HeN1208A, SD1185A, SD1188A, Sxi1218 | Hap 15    | GS1011B                                                                | Hap 28    | SX0830A    |
| Hap 3     | AH1002A                                                        | Hap 16    | HeN1202A                                                               | Hap 29    | SX0831A    |
| Hap 4     | AH1004A                                                        | Hap 17    | HeN1204A                                                               | Hap 30    | SX0831B    |
| Hap 5     | AH1004B                                                        | Hap 18    | HeN1204B                                                               | Hap 31    | Sxi1216    |
| Hap 6     | BJ1311A, BJ1312A, BJ1315B, HeN1201B, Sxi1220B                  | Hap 19    | JL07, JL09, JL11B, JL12, JL13B, LN1307, LN1308, LN1309, LN1310, LN1344 | Hap 32    | Sxi1220A   |
| Hap 7     | BJ1311B, BJ1317B, HeN1201A, HeN1208B, HeN1211                  | Hap 20    | JL10, SD1189A                                                          | Hap 33    | YN21A      |
| Hap 8     | BJ1312B                                                        | Hap 21    | JL11A, SD19, Sxi1217                                                   | Hap 34    | YN21B      |
| Hap 9     | BJ1315A, HeN1202B, Sxi1221                                     | Hap 22    | JL13A                                                                  | Hap 35    | YN22A      |
| Hap 10    | BJ1316                                                         | Hap 23    | SD20A                                                                  | Hap 36    | YN22B      |
| Hap 11    | GS1005A, GS1009                                                | Hap 24    | SD20B                                                                  | Hap 37    | YN23, YN24 |
| Hap 12    | GS1005B                                                        | Hap 25    | SD1185B                                                                | Hap 38    | YN07205A   |
| Hap 13    | GS1008                                                         | Hap 26    | SD1188B, SX0827B, SX0830B                                              | Hap 39    | YN07205B   |

Table S4. The positive selection analyses of the *ZBED1* gene based on SLAC, FEL, REL, MEME and FUBAR methods.

| Codon | SLAC   |         | FEL     |         | REL   |              | MEME       |         | FUBAR |           |
|-------|--------|---------|---------|---------|-------|--------------|------------|---------|-------|-----------|
|       | dN-dS  | p-value | dN-dS   | p-value | dN-dS | Bayes factor | $\omega^+$ | p-value | dN-dS | Post. Pr. |
| 120   | 10.974 | 0.667   | 33.867  | 0.491   | -     | -            | 1.759      | 0.487   | -     | -         |
| 197   | 10.974 | 0.667   | 34.305  | 0.483   | -     | -            | 1.331      | 0.485   | -     | -         |
| 228   | -      | -       | -       | -       | -     | -            | 102.699    | 0.437   | -     | -         |
| 243   | 10.941 | 0.669   | 30.806  | 0.511   | -     | -            | 1.402      | 0.507   | -     | -         |
| 312   | 10.962 | 0.668   | 31.473  | 0.505   | -     | -            | 1.710      | 0.490   | -     | -         |
| 324   | 54.870 | 0.132   | 166.558 | 0.125   | 5.583 | 4.726E+06*   | 7.018      | 0.218   | 3.233 | 0.971*    |
| 327   | 10.974 | 0.667   | 34.068  | 0.292   | -     | -            | 1.825      | 0.280   | -     | -         |
| 356   | 10.717 | 0.683   | 29.944  | 0.531   | -     | -            | 1.623      | 0.500   | -     | -         |
| 536   | 10.974 | 0.667   | 34.292  | 0.483   | -     | -            | 1.794      | 0.484   | -     | -         |
| 701   | 10.228 | 0.715   | 37.965  | 0.276   | -     | -            | 1.545      | 0.320   | -     | -         |

\*Statistically significant value.
